# Supplementary material for: Treatment of intracranial neoplasia in dogs using higher doses: A randomized controlled trial comparing a boosted to a conventional radiation protocol
Source: PubMed Central journal article supplement — J Vet Intern Med. 2022 Jun 30;36(4):1353–64. doi: 10.1111/jvim.16472 (PMC9308416; doi:10.1111/jvim.16472), 2022-06-30
Supplement: JVIM-36-1353-s001.pdf [file JVIM-36-1353-s001.pdf]

**Supplemental Table 1:** Mean volumes and doses for target volumes for the two different treatment protocols (ITT)

|            | <b>Control group (n=28)</b> |                       |                        |                        | <b>SIB group (n=29)</b>                 |                       |                        |                        |
|------------|-----------------------------|-----------------------|------------------------|------------------------|-----------------------------------------|-----------------------|------------------------|------------------------|
|            | <b>(10×4 Gy)</b>            |                       |                        |                        | <b>(10×4 Gy + 11% boost to the GTV)</b> |                       |                        |                        |
|            | <b>Mean</b>                 | <b>D<sub>2%</sub></b> | <b>D<sub>50%</sub></b> | <b>D<sub>98%</sub></b> | <b>Mean</b>                             | <b>D<sub>2%</sub></b> | <b>D<sub>50%</sub></b> | <b>D<sub>98%</sub></b> |
|            | <b>volume</b>               | <b>(Gy)</b>           | <b>(Gy)</b>            | <b>(Gy)</b>            | <b>volume</b>                           | <b>(Gy)</b>           | <b>(Gy)</b>            | <b>(Gy)</b>            |
|            | <b>(cm<sup>3</sup>)</b>     |                       |                        |                        | <b>(cm<sup>3</sup>)</b>                 |                       |                        |                        |
| <b>GTV</b> | 3.2 ± 2.2                   | 40.6 ± 0.2            | 40.1 ± 0.2             | 39.3 ± 0.7             | 3.6 ± 2.7                               | 45.4 ± 1.1            | 44.4 ± 0.9             | 43.0 ± 0.9             |
| <b>CTV</b> | 7.4 ± 5.3                   | 41.0 ± 0.4            | 40.2 ± 0.2             | 39.3 ± 0.4             | 7.6 ± 5.4                               | 45.2 ± 1.2            | 43.4 ± 0.9             | 40.7 ± 1.1             |
| <b>PTV</b> | 13.0 ± 7.8                  | 41.1 ± 0.5            | 40.1 ± 0.1             | 38.1 ± 0.6             | 13.2 ± 7.9                              | 45.1 ± 0.9            | 42.1 ± 0.9             | 38.4 ± 0.6             |

values expressed as mean ± SD; CTV, clinical target volume; D<sub>2%</sub>, near-maximum dose; D<sub>50%</sub>, median dose; D<sub>98%</sub>, near-minimum dose; GTV, gross tumor volume; PTV, planning target volume; SIB, simultaneous integrated boost.

**Supplemental Table 2:** Mean volumes and doses for target volumes for the two different treatment protocols (PP)

|            | <b>Control group (n=27)</b> |                       |                        |                        | <b>SIB group (n=27)</b>                 |                       |                        |                        |
|------------|-----------------------------|-----------------------|------------------------|------------------------|-----------------------------------------|-----------------------|------------------------|------------------------|
|            | <b>(10×4 Gy)</b>            |                       |                        |                        | <b>(10×4 Gy + 11% boost to the GTV)</b> |                       |                        |                        |
|            | <b>Mean</b>                 | <b>D<sub>2%</sub></b> | <b>D<sub>50%</sub></b> | <b>D<sub>98%</sub></b> | <b>Mean</b>                             | <b>D<sub>2%</sub></b> | <b>D<sub>50%</sub></b> | <b>D<sub>98%</sub></b> |
|            | <b>volume</b>               | <b>(Gy)</b>           | <b>(Gy)</b>            | <b>(Gy)</b>            | <b>volume</b>                           | <b>(Gy)</b>           | <b>(Gy)</b>            | <b>(Gy)</b>            |
|            | <b>(cm<sup>3</sup>)</b>     |                       |                        |                        | <b>(cm<sup>3</sup>)</b>                 |                       |                        |                        |
| <b>GTV</b> | 3.2 ± 2.3                   | 40.6 ± 0.2            | 40.0 ± 0.2             | 39.3 ± 0.7             | 3.7 ± 2.8                               | 45.5 ± 0.6            | 44.6 ± 0.1             | 43.1 ± 0.7             |
| <b>CTV</b> | 6.9 ± 4.4                   | 41.0 ± 0.4            | 40.1 ± 0.1             | 39.3 ± 0.4             | 7.9 ± 5.5                               | 45.4 ± 0.8            | 43.6 ± 0.7             | 40.8 ± 1.1             |
| <b>PTV</b> | 12.2 ± 6.6                  | 41.1 ± 0.5            | 40.1 ± 0.1             | 38.1 ± 0.6             | 13.5 ± 8.1                              | 45.3 ± 0.4            | 42.2 ± 0.9             | 38.4 ± 0.6             |

values expressed as mean ± SD; CTV, clinical target volume; D<sub>2%</sub>, near-maximum dose; D<sub>50%</sub>, median dose; D<sub>98%</sub>, near-minimum dose; GTV, gross tumor volume; PTV, planning target volume; SIB, simultaneous integrated boost.
